# Supplementary material for: Investigation of the adsorption behaviour of different types of dyes on MIL-100(Fe) and their removal from natural water
Source: Royal Society of Chemistry journal article supplement (doi:10.1039/c4ay02726d), 2014-12-19
Supplement: c4ay02726d1.pdf [file c4ay02726d1.pdf]

## Electronic Supporting Information

### **Investigation of the adsorption behaviour of different types of dyes on MIL-100(Fe) and their removal from natural water**

Yaoyao Jia, Qing Jin, Yan Li\*, Yuxiu Sun\*, Jianzhong Huo, Xiaojun Zhao

*Key Laboratory of Inorganic-Organic Hybrid Functional Material Chemistry, Ministry of Education, Tianjin Key Laboratory of Structure and Performance for Functional Molecule, College of Chemistry, Tianjin Normal University, Tianjin, 300387, P.R. China*

\* E-mail: nkliyan398@gmail.com

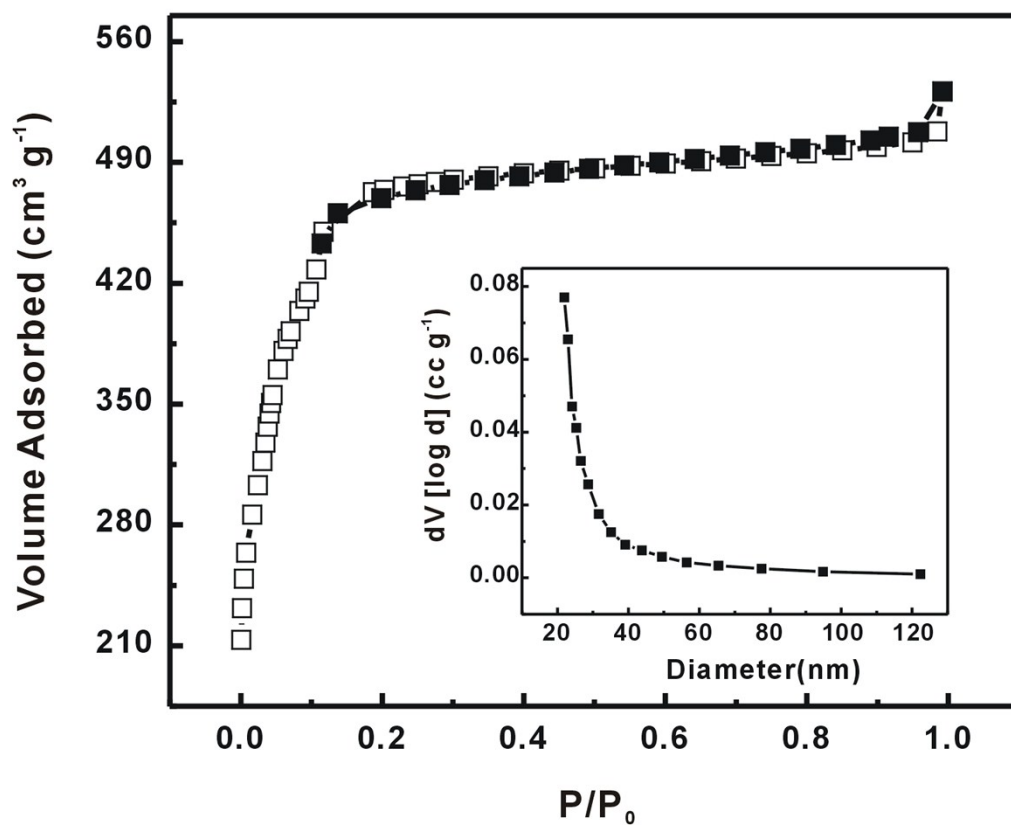

**Figure S1.**  $N_2$  adsorption-desorption isotherms (left) and the pore size distribution (right) of the as-synthesized MIL-100.

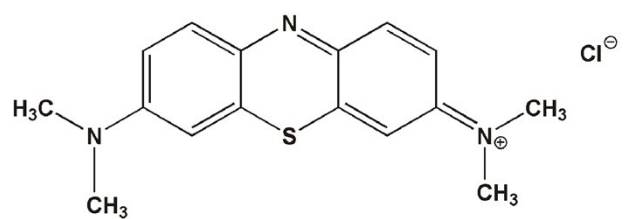[illegible]

**Figure S2.** The structures of Methylene Blue (A), Isatin (B) and Methyl Blue (C).

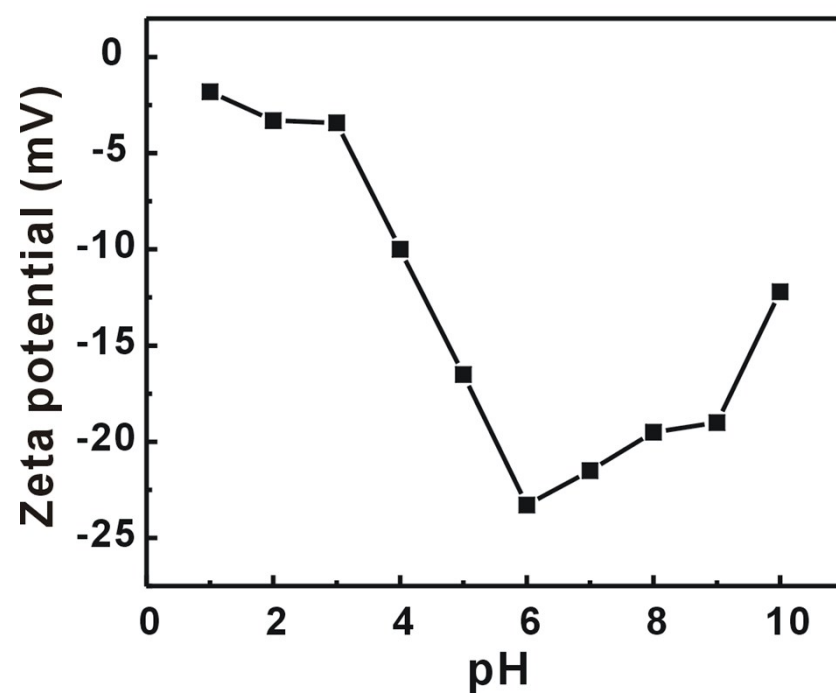

**Figure S3.** Zeta potentials of MIL-100(Fe) in ultrapure water under various pH at room temperature.

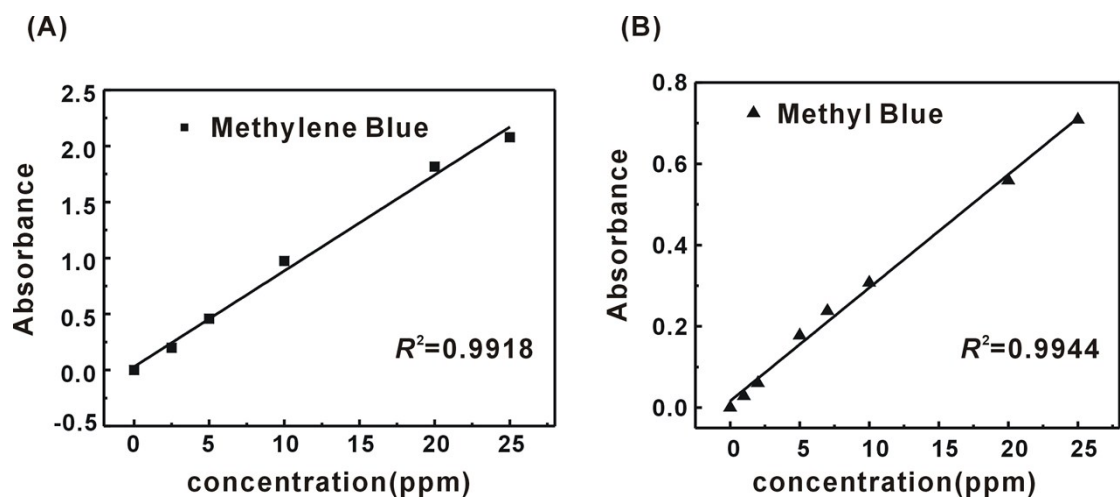

**Figure S4.** The plots of absorbance vs concentration of dyes (A) Methylene Blue and (B) Methyl Blue.

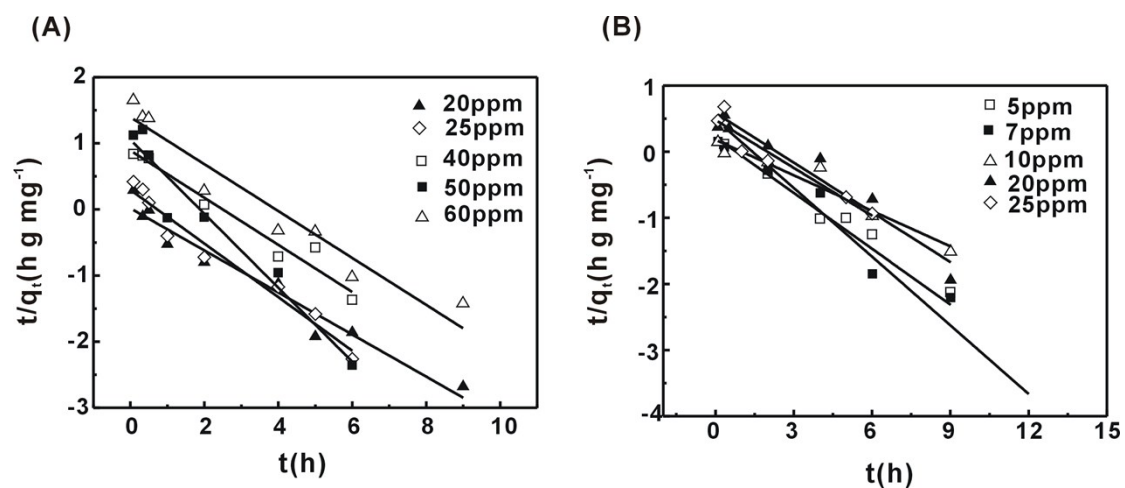

**Figure S5.** Plots of pseudo-first-order kinetics for the adsorption of Methylene Blue(A) and Methyl Blue(B) at different initial concentrations on MIL-100(Fe) at room temperature and pH 6.0.

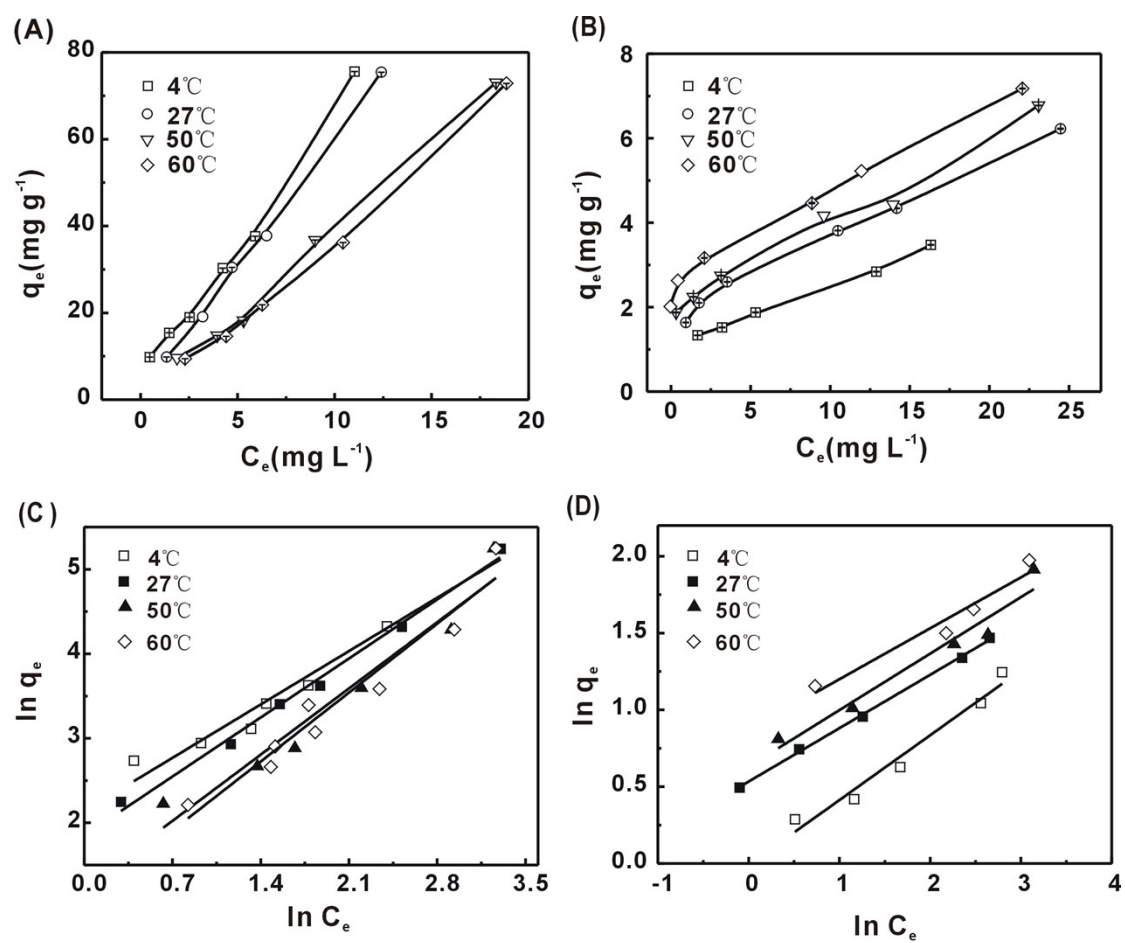

**Figure S6.** Adsorption isotherms for the adsorption of (A) Methylene Blue and (B) Methyl Blue on MIL-100(Fe) in the temperature range of 4–60°C. And the corresponding Freundlich plots for (C) Methylene Blue and (D) Methyl Blue.

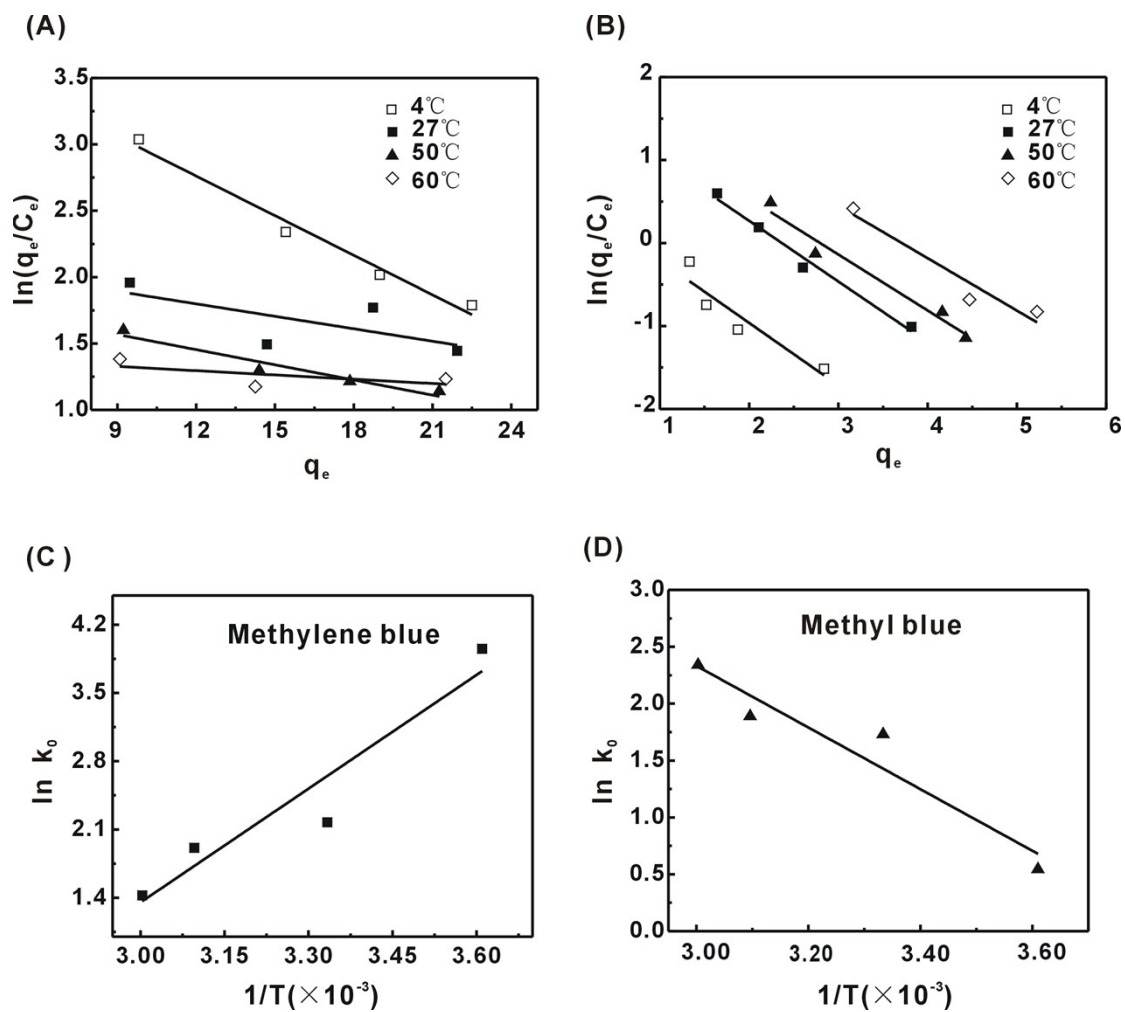

**Figure S7.** Plots of  $\ln(q_e/C_e)$  vs  $q_e$  at various temperatures and  $\ln K_0$  against  $1/T$  for the adsorption of Methylene Blue(A, C) and Methyl Blue(B, D) on MIL-100(Fe).



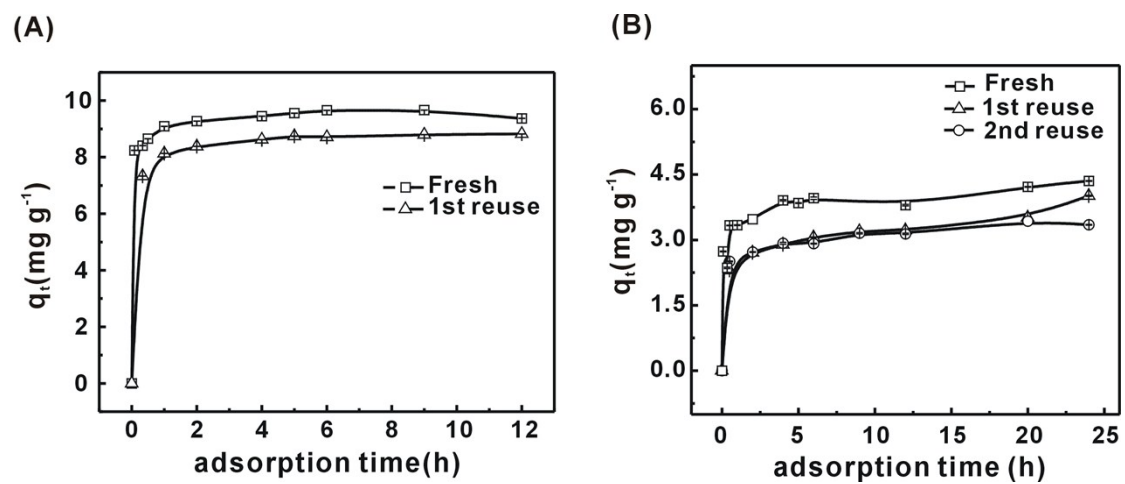

**Figure S8.** Time-dependent adsorption capacity of Methylene Blue and Methyl Blue on fresh and regenerated MIL-100(Fe).

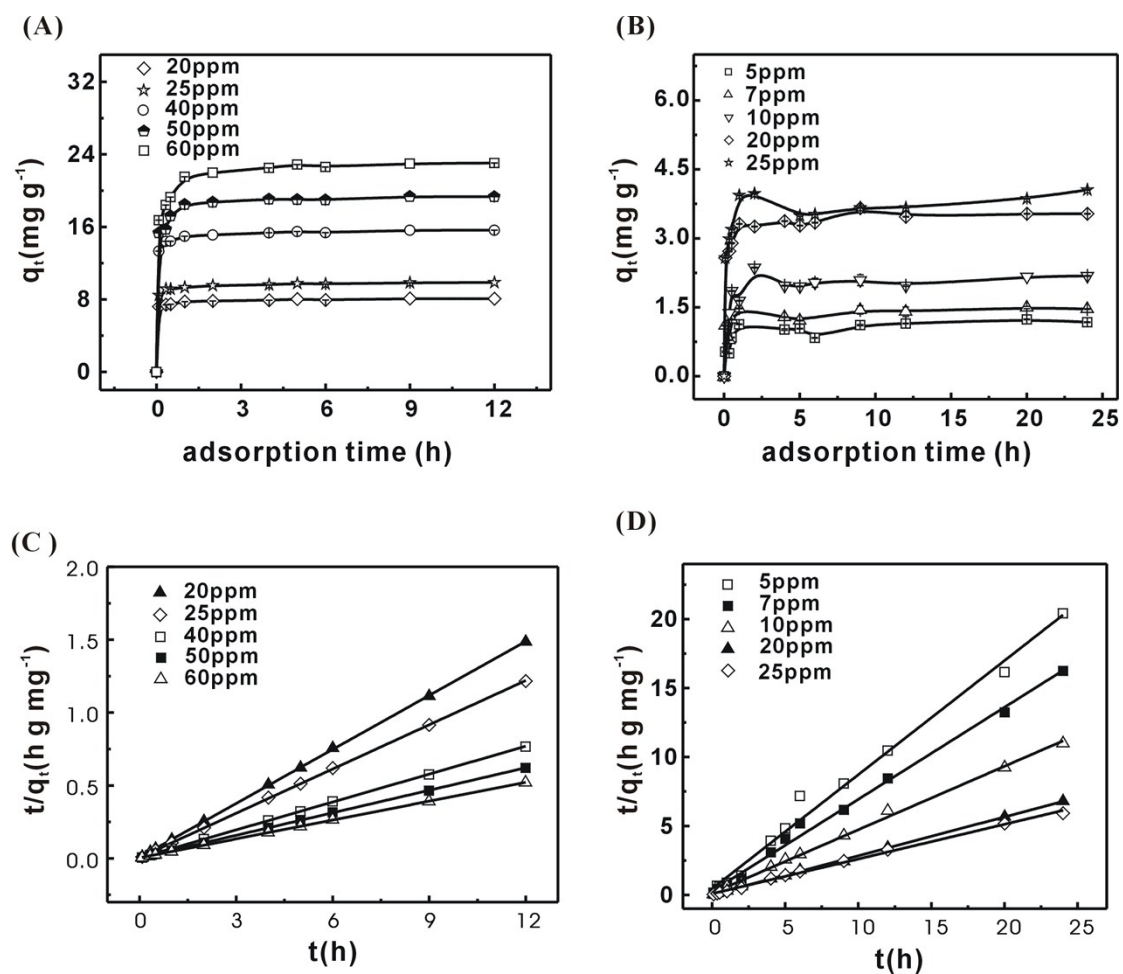

**Figure S9.** Time-dependent adsorption of Methylene Blue(A) and Methyl Blue(B) on MIL-100(Fe) in rainwater. And the plots of pseudo-second-order kinetics for the adsorption of Methylene Blue (C) and Methyl Blue (D) at different initial concentrations at room temperature.

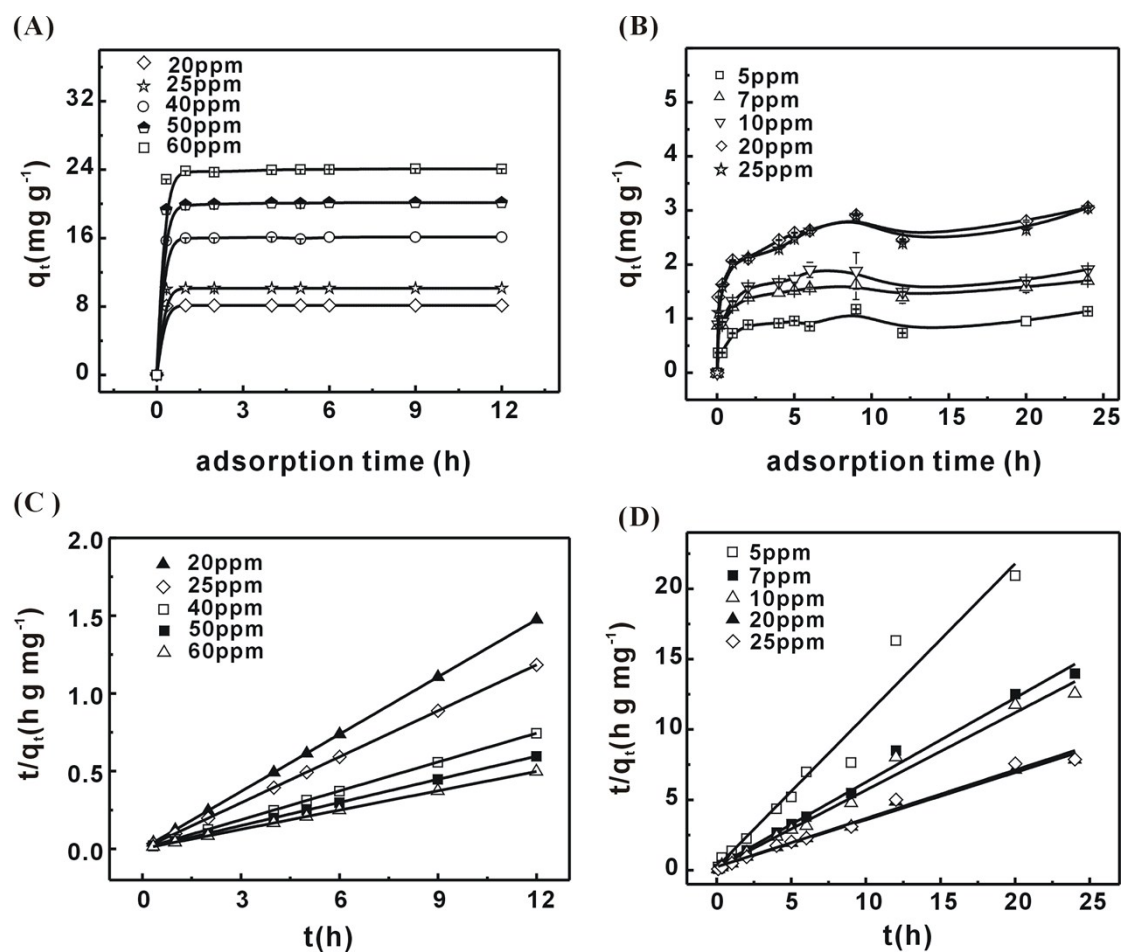

**Figure S10.** Time-dependent adsorption of Methylene Blue(A) and Methyl Blue(B) on MIL-100(Fe) in river water. And the plots of pseudo-second-order kinetics for the adsorption of Methylene Blue (C) and Methyl Blue (D) at different initial concentrations at room temperature.
